# Supplementary material for: Tumor-localized interleukin-2 and interleukin-12 combine with radiation therapy to safely potentiate regression of advanced malignant melanoma in pet dogs
Source: PubMed Central journal article supplement — bioRxiv. 2024 Feb 14:2024.02.12.579965. Preprint. [Version 1] doi: 10.1101/2024.02.12.579965 (PMC10888855; doi:10.1101/2024.02.12.579965), 2024-02-14
Supplement: media-1.pdf [file media-1.pdf]

1 **EXTENDED DATA FILE**

2

3 Extended Data Figure 1: Additional patient characteristics and CT tumor response

4

5 Extended Data Figure 2: Local RT causes transient lymphodepletion in murine melanomas

6

7 Extended Data Figure 3: Kaplan-Meier survival plots of dogs treated for malignant melanoma

8

9 Extended Data Figure 4: IL-2/IL-12 cytokine dose does not appear to correlate with tumor  
10 response or survival

11

12 Extended Data Figure 5: Incidence of treatment-related adverse events

13

14 Extended Data Figure 6: IFN- $\gamma$  and IL-10 response to cytokine-only or RT-only treatment

15

16 Extended Data Figure 7: Characterization of anti-drug antibody responses in treated dogs

17

18 Extended Data Figure 8: IHC analysis of delayed responder shows absence of melanoma

19

20 Extended Data Figure 9: IHC analysis of CD3 infiltration in progressor dogs

21

22 Extended Data Figure 10: Combined tumor and metastatic LN treatment response

23

|                               | <u>At Presentation</u> |            |                |           | <u>Primary Tumor Volume (in cm<sup>3</sup>, by CT)</u> |        |              |
|-------------------------------|------------------------|------------|----------------|-----------|--------------------------------------------------------|--------|--------------|
|                               | Tumor Length (mm)      | LN Disease | Metastasis     | WHO Stage | Day 0                                                  | Day 28 | Day 84       |
| <b>1x Dose Level Cohort</b>   |                        |            |                |           |                                                        |        |              |
| "Cricket"                     | 29                     | Yes        | Lung           | IV        | 4.7                                                    | 2.4    | 3.5          |
| "Nala"                        | 30                     | Yes        | No             | III       | 7.5                                                    | 6.5    | 6.1          |
| "Dezzi"                       | 26                     | No         | No             | II        | 11.6                                                   | 2.8    | 0.1          |
| <b>2x Dose Level Cohort</b>   |                        |            |                |           |                                                        |        |              |
| "Maverick"                    | 31                     | Yes        | No             | III       | 3.5                                                    | 0.3    | 0.0001       |
| "Max"                         | 28                     | No         | No             | II        | 7.6                                                    | 0.5    | 0.7          |
| "Samba"                       | 8                      | No         | No             | I         | 0.5                                                    | 0      | 0            |
| "Peanut"                      | 42                     | Yes        | No             | III       | 10.2                                                   | 6.2    | 10.9         |
| "Izabella"                    | 27                     | No         | No             | II        | 5.9                                                    | 0.3    | 0.4          |
| "Emily"                       | 30                     | Yes        | Skin           | IV        | 16.3                                                   | 3.3    | (euthanized) |
| <b>3.3x Dose Level Cohort</b> |                        |            |                |           |                                                        |        |              |
| "Marley"                      | not collected          | Yes        | No             | III       | 18.6                                                   | 7.8    | 21.7         |
| "Komen"                       | not collected          | Yes        | No             | III       | 6.8                                                    | 1.8    | 0.4          |
| "Candy"                       | 36                     | Yes        | Lung and Liver | IV        | 9                                                      | 0.2    | 0.5          |
| "Leahy"                       | 32                     | No         | No             | II        | 2.7                                                    | 1.6    | 1.1          |
| <b>5x Dose Level Cohort</b>   |                        |            |                |           |                                                        |        |              |
| "Hank"                        | 65                     | Yes        | Lung           | IV        | 43.4                                                   | 50.8   | (euthanized) |
| "Dexter"                      | 20                     | Yes        | Lung           | IV        | 3                                                      | 0.1    | 0.0001       |

24  
25  
26  
27  
28  
29  
30

**Extended Data Figure 1: Additional patient characteristics and CT response data.**

Ten of fifteen dogs presented with stage III or greater tumors at trial enrollment, with corresponding disease observed at tumor-draining lymph nodes or distal metastases. Radiologic response to treatment was measured using CT, with many patients displaying rapid and robust decreases in primary tumor volume.

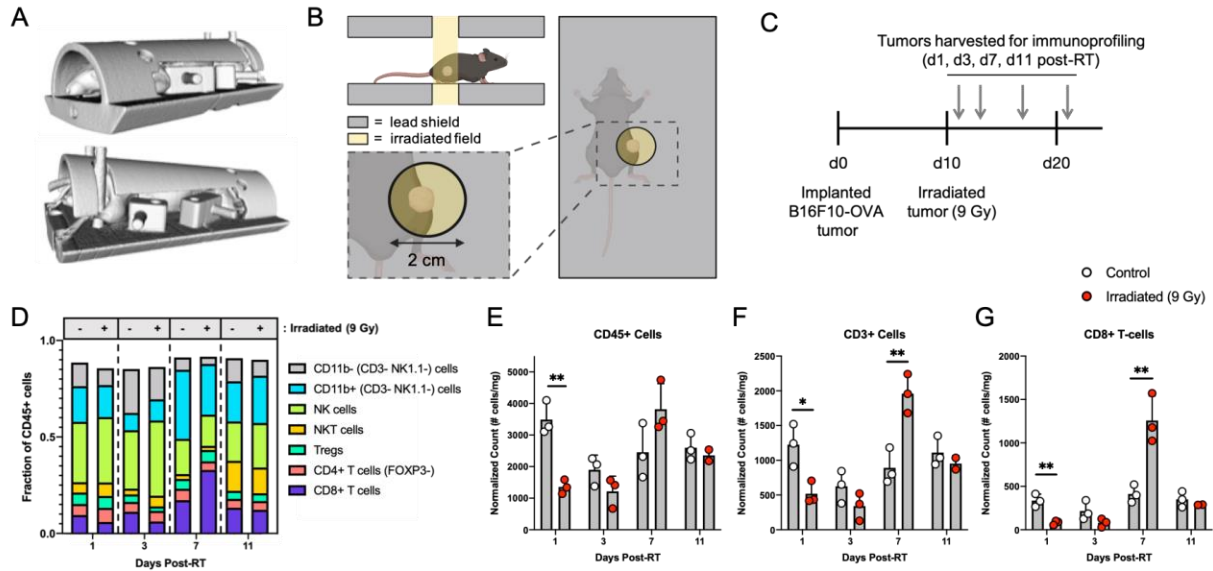

31  
 32  
 33 **Extended Data Figure 2: Local RT causes transient lymphodepletion in murine**  
 34 **melanomas.** (A) 3D renderings of a mouse in the restrainer. The mouse is held in position by a  
 35 pair of adjustable thorax and abdominopelvic blocks, and two sets of hind limb pins. (B)  
 36 Schematic of local irradiation setup. The restrained mouse is placed between two lead shields  
 37 (grey) and positioned to center the tumor within a 2 cm diameter aperture, which defines the  
 38 irradiated field (yellow). A 9 Gy dose of radiation is delivered using a cesium-137 gamma  
 39 irradiator. (C) Schema for immunophenotyping of tumors 1, 3, 7, and 11 days after irradiation.  
 40 (D) Relative quantities of intratumoral immune populations (shown as fraction of CD45+ cells)  
 41 following irradiation or control treatment, measured by flow cytometry. (E) Densities of  
 42 intratumoral CD45+ cells (F) CD3+ cells (G) and CD8+ T cells following irradiation (red) or  
 43 control (white) treatment (n = 3/group, mean + S.D.).  
 44

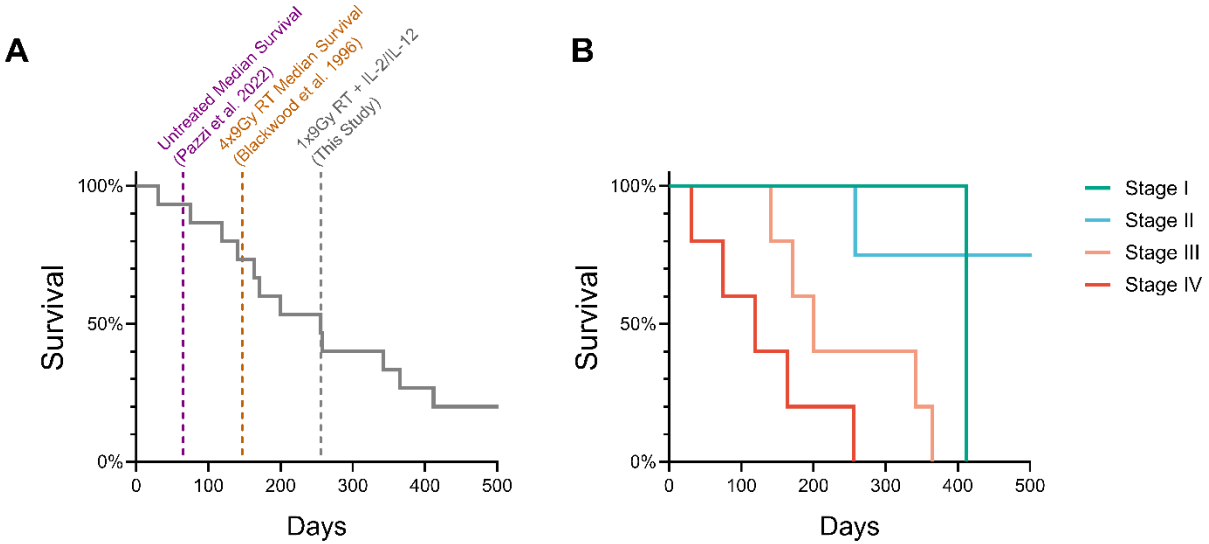

45  
 46 **Extended Data Figure 3: Kaplan-Meier survival plots of dogs treated for malignant**  
 47 **melanoma.** (A) Kaplan-Meier plot showing survival time of all dogs treated with single 9 Gy  
 48 dose of radiation therapy (RT) with up to six doses of intratumoral IL-2 and IL-12 cytokines,  
 49 regardless of tumor stage and cytokine dose level. Dotted lines indicate the median survival  
 50 times reported for untreated (65 days; purple) malignant melanoma and 4x9Gy RT treatment  
 51 (147 days; orange) in dogs. Median survival for this study was 256 days across all treatment  
 52 cohorts and tumor stages. (B) Kaplan-Meier plot showing survival time of dogs broken down by  
 53 tumor stage at time of enrollment.

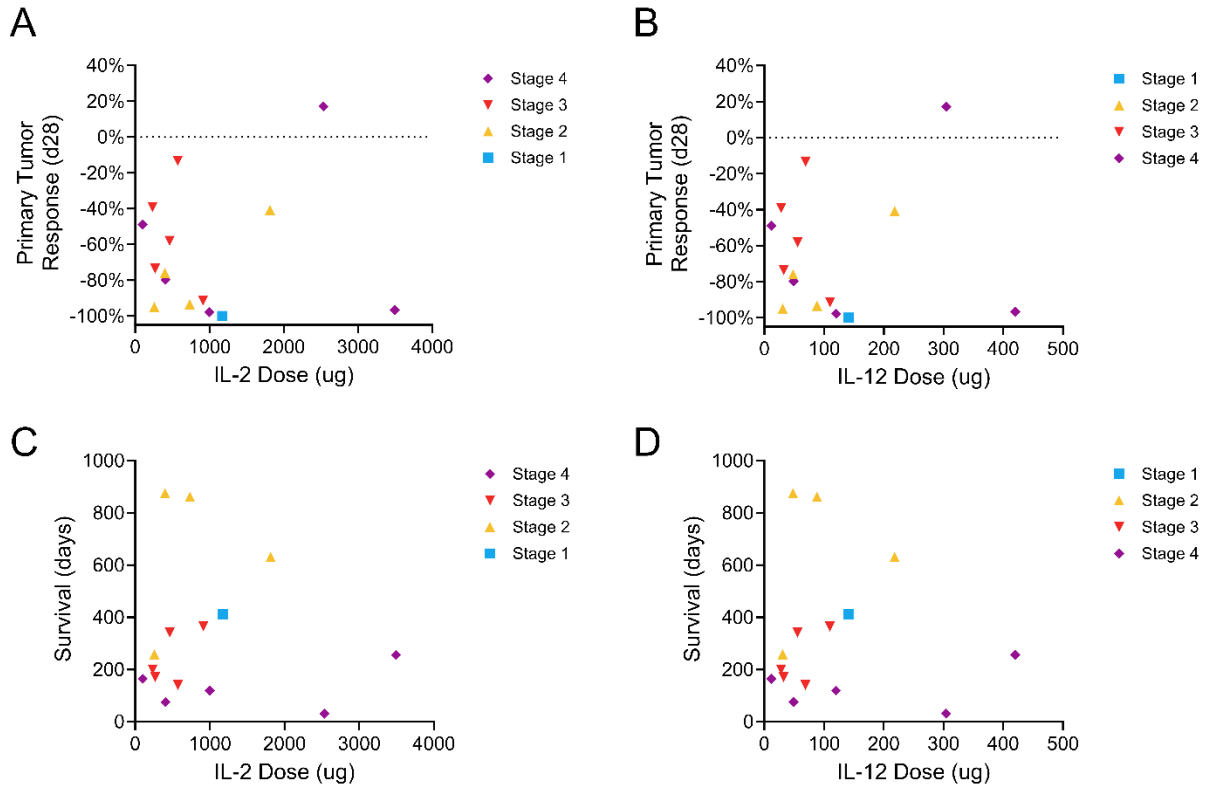

54  
55

56 **Extended Data Figure 4: IL-2/IL-12 cytokine dose does not appear to correlate with tumor**  
 57 **response or survival.** (A, B) Primary tumor responses measured at day 28 via CT are not  
 58 improved at higher doses of IL-2 or IL-12 cytokine. (C, D) Similarly, overall survival appears to  
 59 correlate more favorably with WHO tumor stage than IL-2 or IL-12 cytokine dose.

| Event                                | Cohort 1x<br>(n= 3) |            |           |         |         | Cohort 2x<br>(n= 6) |            |            |            |          | Cohort 3.3x<br>(n= 4) |            |          |           |         | Cohort 5x<br>(n= 2) |            |            |            |          | Total (n=15)      |
|--------------------------------------|---------------------|------------|-----------|---------|---------|---------------------|------------|------------|------------|----------|-----------------------|------------|----------|-----------|---------|---------------------|------------|------------|------------|----------|-------------------|
|                                      | Any grade           | Grade 1    | Grade 2   | Grade 3 | Grade 4 | Any grade           | Grade 1    | Grade 2    | Grade 3    | Grade 4  | Any grade             | Grade 1    | Grade 2  | Grade 3   | Grade 4 | Any grade           | Grade 1    | Grade 2    | Grade 3    | Grade 4  |                   |
| <b>Any event</b>                     | 40                  | 33 (82.5%) | 7 (17.5%) | 0       | 0       | 168                 | 93 (55.4%) | 54 (32.1%) | 18 (10.7%) | 3 (1.8%) | 122                   | 84 (68.8%) | 28 (23%) | 10 (8.2%) | 0       | 84                  | 36 (42.8%) | 31 (37%)   | 15 (17.8%) | 2 (2.4%) | Total= 414 (100%) |
| <b>Blood/bone marrow</b>             |                     |            |           |         |         |                     |            |            |            |          |                       |            |          |           |         |                     |            |            |            |          |                   |
| Hemoglobinemia                       | 5                   | 5 (12.5%)  | 0         | 0       | 0       | 16                  | 13 (7.7%)  | 2 (1.2%)   | 1 (0.6%)   | 0        | 14                    | 11 (9%)    | 3 (2.5%) | 0         | 0       | 8                   | 7 (8.3%)   | 1 (1.2%)   | 0          | 0        | 43 (10.4%)        |
| Thrombocytopenia                     | 4                   | 4 (10%)    | 0         | 0       | 0       | 12                  | 10 (5.9%)  | 2 (1.2%)   | 0          | 0        | 11                    | 8 (6.5%)   | 3 (2.5%) | 0         | 0       | 6                   | 2 (2.4%)   | 3 (3.6%)   | 0          | 1 (1.2%) | 33 (8%)           |
| Neutropenia                          | 1                   | 1 (2.5%)   | 0         | 0       | 0       | 0                   | 0          | 0          | 0          | 0        | 0                     | 0          | 0        | 0         | 0       | 0                   | 0          | 0          | 0          | 0        | 1 (0.2%)          |
| Lymphocytosis                        | 0                   | 0          | 0         | 0       | 0       | 1                   | 0          | 1 (0.6%)   | 0          | 0        | 0                     | 0          | 0        | 0         | 0       | 0                   | 0          | 0          | 0          | 0        | 1 (0.2%)          |
| <b>Constitutional clinical signs</b> |                     |            |           |         |         |                     |            |            |            |          |                       |            |          |           |         |                     |            |            |            |          |                   |
| Fever                                | 4                   | 1 (2.5%)   | 3 (7.5%)  | 0       | 0       | 11                  | 6 (3.6%)   | 5 (3%)     | 0          | 0        | 6                     | 1 (0.8%)   | 3 (2.5%) | 2 (1.6%)  | 0       | 4                   | 0          | 3 (3.6%)   | 1 (1.2%)   | 0        | 25 (6%)           |
| Lethargy/fatigue                     | 6                   | 5 (12.5%)  | 1 (2.5%)  | 0       | 0       | 8                   | 6 (3.6%)   | 2 (1.2%)   | 0          | 0        | 14                    | 10 (8.2%)  | 3 (2.5%) | 1 (0.8%)  | 0       | 5                   | 1 (1.2%)   | 3 (3.6%)   | 1 (1.2%)   | 0        | 33 (8%)           |
| <b>Dermatologic/Skin</b>             |                     |            |           |         |         |                     |            |            |            |          |                       |            |          |           |         |                     |            |            |            |          |                   |
| Edema (injected region)              | 1                   | 0          | 1 (2.5%)  | 0       | 0       | 3                   | 3 (1.8%)   | 0          | 0          | 0        | 4                     | 3 (2.5%)   | 1 (0.8%) | 0         | 0       | 2                   | 2 (2.4%)   | 0          | 0          | 0        | 10 (2.4%)         |
| <b>Gastrointestinal</b>              |                     |            |           |         |         |                     |            |            |            |          |                       |            |          |           |         |                     |            |            |            |          |                   |
| Diarrhea                             | 3                   | 3 (7.5%)   | 0         | 0       | 0       | 9                   | 5 (3%)     | 3 (1.8%)   | 1 (0.6%)   | 0        | 2                     | 2 (1.6%)   | 0        | 0         | 0       | 3                   | 1 (1.2%)   | 2 (2.4%)   | 0          | 0        | 17 (4.1%)         |
| Anorexia                             | 4                   | 4 (10%)    | 0         | 0       | 0       | 9                   | 8 (4.8%)   | 1 (0.6%)   | 0          | 0        | 11                    | 9 (7.4%)   | 1 (0.8%) | 1 (0.8%)  | 0       | 6                   | 3 (3.6%)   | 1 (1.2%)   | 2 (2.4%)   | 0        | 30 (7.2%)         |
| Vomiting                             | 0                   | 0          | 0         | 0       | 0       | 0                   | 0          | 0          | 0          | 0        | 2                     | 2 (1.6%)   | 0        | 0         | 0       | 2                   | 2 (2.4%)   | 0          | 0          | 0        | 4 (1%)            |
| Dehydration                          | 0                   | 0          | 0         | 0       | 0       | 0                   | 0          | 0          | 0          | 0        | 1                     | 0          | 1 (0.8%) | 0         | 0       | 0                   | 0          | 0          | 0          | 0        | 1 (0.2%)          |
| <b>Metabolic</b>                     |                     |            |           |         |         |                     |            |            |            |          |                       |            |          |           |         |                     |            |            |            |          |                   |
| Increased ALT                        | 7                   | 6 (15%)    | 1 (2.5%)  | 0       | 0       | 43                  | 16 (9.5%)  | 22 (13%)   | 2 (1.2%)   | 3 (1.8%) | 17                    | 10 (8.2%)  | 4 (3.3%) | 3 (2.5%)  | 0       | 17                  | 2 (2.4%)   | 10 (11.9%) | 4 (4.7%)   | 1 (1.2%) | 84 (20.3%)        |
| Increased ALP                        | 4                   | 4 (10%)    | 0         | 0       | 0       | 33                  | 8 (4.8%)   | 11 (6.5%)  | 14 (8.3%)  | 0        | 28                    | 19 (15.6%) | 6 (4.9%) | 3 (2.5%)  | 0       | 16                  | 6 (7.1%)   | 4 (4.7%)   | 6 (7.1%)   | 0        | 81 (19.6%)        |
| Increased CPK                        | 0                   | 0          | 0         | 0       | 0       | 7                   | 6 (3.6%)   | 1 (0.6%)   | 0          | 0        | 3                     | 3 (2.5%)   | 0        | 0         | 0       | 4                   | 4 (4.7%)   | 0          | 0          | 0        | 14 (3.4%)         |
| Hypoalbuminemia                      | 0                   | 0          | 0         | 0       | 0       | 15                  | 12 (7.1%)  | 3 (1.8%)   | 0          | 0        | 3                     | 2 (1.6%)   | 1 (0.8%) | 0         | 0       | 8                   | 5 (5.9%)   | 3 (3.6%)   | 0          | 0        | 26 (6.3%)         |
| Increased Bilirubin                  | 0                   | 0          | 0         | 0       | 0       | 1                   | 0          | 1 (0.6%)   | 0          | 0        | 4                     | 3 (2.5%)   | 1 (0.8%) | 0         | 0       | 3                   | 1 (1.2%)   | 1 (1.2%)   | 1 (1.2%)   | 0        | 8 (2%)            |
| <b>Pain</b>                          |                     |            |           |         |         |                     |            |            |            |          |                       |            |          |           |         |                     |            |            |            |          |                   |
| Pain (injected region)               | 1                   | 0          | 1 (2.5%)  | 0       | 0       | 0                   | 0          | 0          | 0          | 0        | 2                     | 1 (0.8%)   | 1 (0.8%) | 0         | 0       | 0                   | 0          | 0          | 0          | 0        | 3 (0.7%)          |

Extended Data Figure 5: Incidence of treatment-related adverse events.

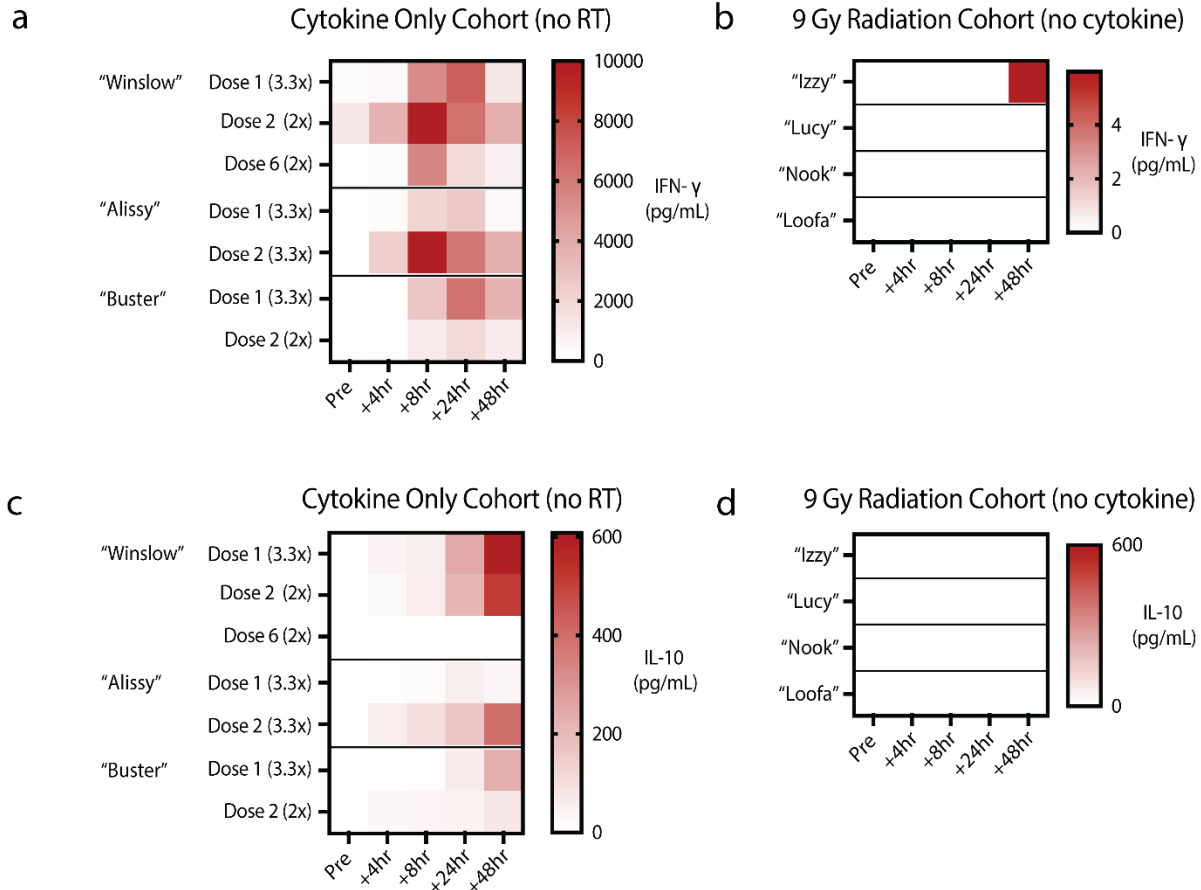

64  
65  
66  
67  
68  
69  
70  
71  
72  
73  
74  
75

**Extended Data Figure 6: IFN- $\gamma$  and IL-10 response to cytokine-only or RT-only treatment.** (a, b) The quantity of gamma interferon in patient serum was measured via ELISA at intervals following dosing of IL-2/IL-12 cytokines only (a) or 9 Gy radiation only (b). The increase in serum gamma interferon is only observed following intratumoral cytokine treatment. (c,d) Similarly, the amount of serum IL-10 was measured via ELISA following the same treatments. A delayed increase in IL-10 is only observed in the serum of dogs receiving intratumoral cytokine therapy (c) and was not detected in the serum of dogs receiving only a 9 Gy dose of radiation (d). This suggests that the systemic changes in cytokines/chemokines observed in Figure 2 are driven by the actions of the cytokine portion of the combination therapy, not the radiation dose alone.

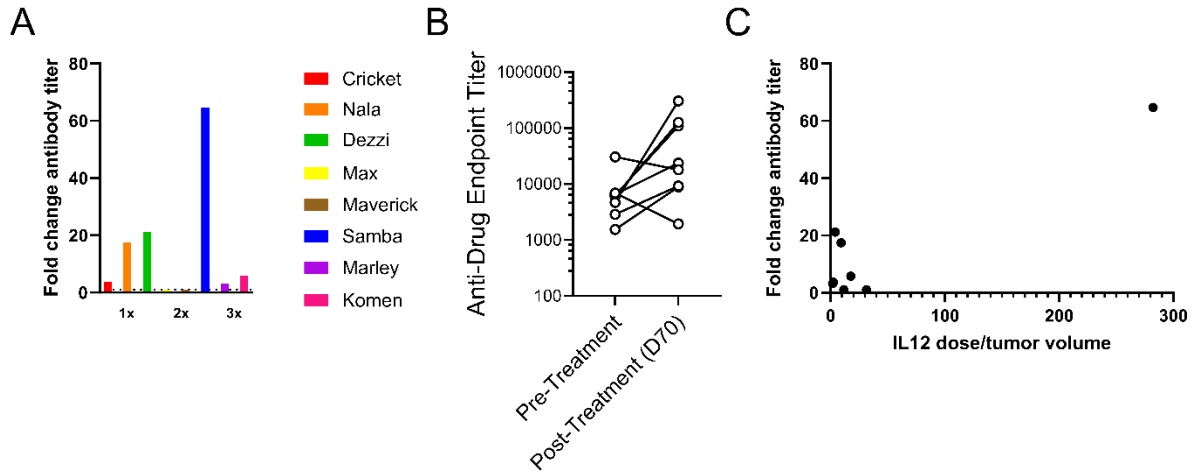

76  
 77 **Extended Data Figure 7: Characterization of anti-drug antibody responses in treated**  
 78 **dogs.** (a) ELISA to characterize anti-drug antibodies against cLAIR-CSA-cIL2/cIL12-CSA-cLAIR  
 79 was performed and fold-change in antibody titer was calculated using pre-treatment serum. (b)  
 80 Endpoint titer values before and after receiving treatment was calculated as the reciprocal  
 81 dilution at which 2x sample baseline was observed. (c) The ratio of dosed drug (ug) to tumor  
 82 volume (cm<sup>3</sup>) suggests that at doses exceeding the capacity of tumor retention through collagen  
 83 binding, there may be an increased potential to raise anti-drug antibodies.  
 84



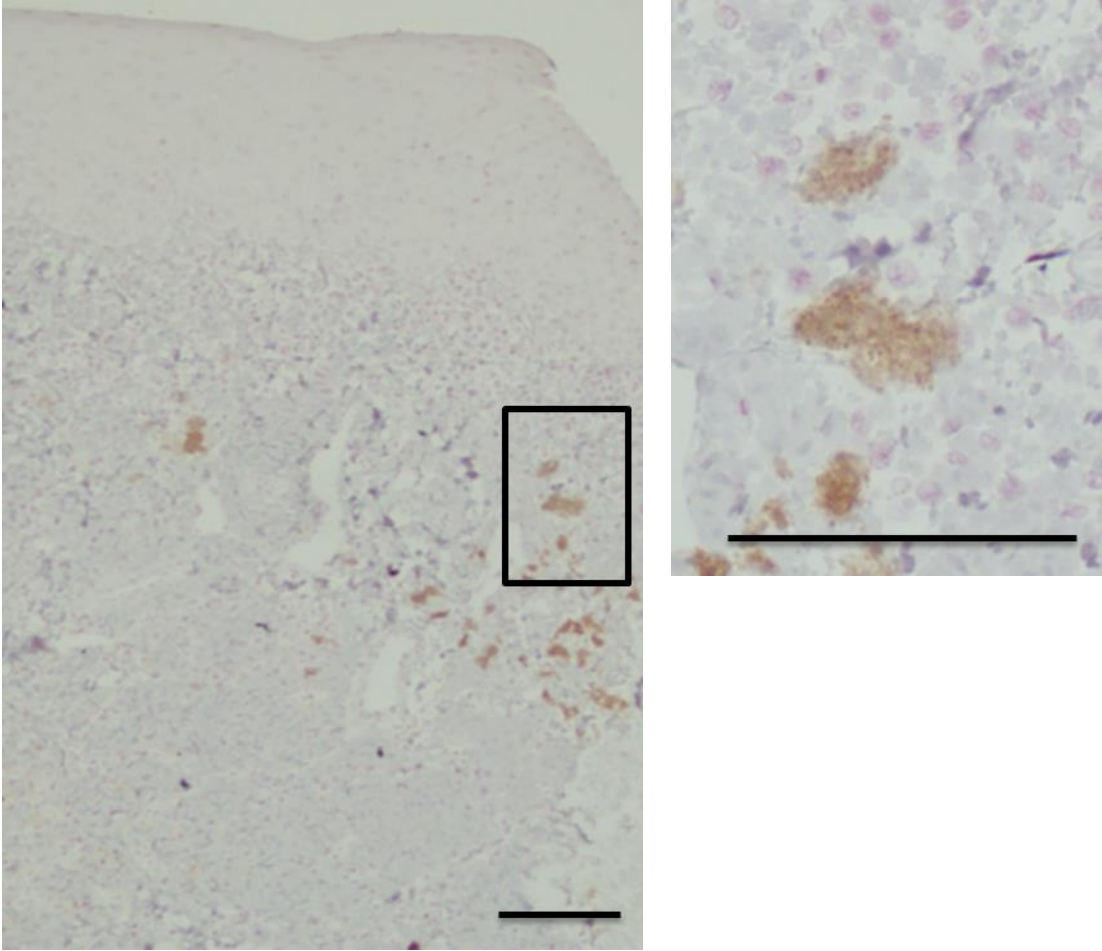

85  
86 **Extended Data Figure 8: IHC analysis of delayed responder shows absence of melanoma.**  
87 No positive IHC signal is observed for Melan-A (brown) to indicate residual melanoma in the  
88 gingival tissue of the delayed responder. Brown pigment consistent with cytoplasmic  
89 accumulation of melanin is present within scattered melanophages (inset). Melan-A IHC with  
90 hematoxylin counterstain, scale bar 100 $\mu$ m.

(a) "Candy" – CD3 Hot

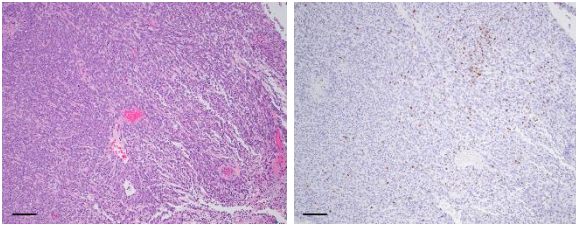

(b) "Marley" – CD3 Hot

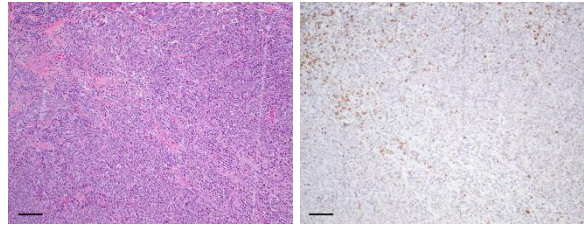

(c) "Komen" – CD3 Hot

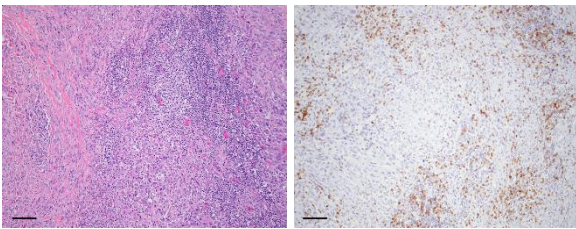

(d) "Hank" – CD3 Hot

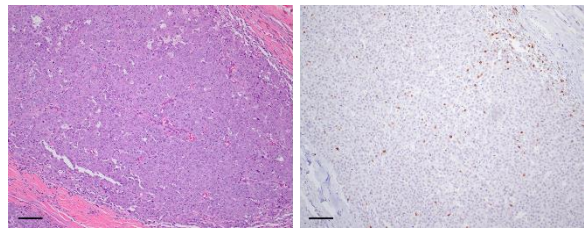

(e) "Nala" – CD3 Excluded

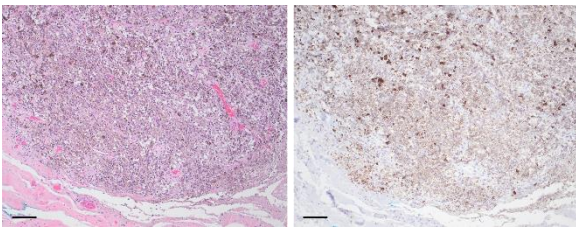

(f) "Cricket" – CD3 Cold

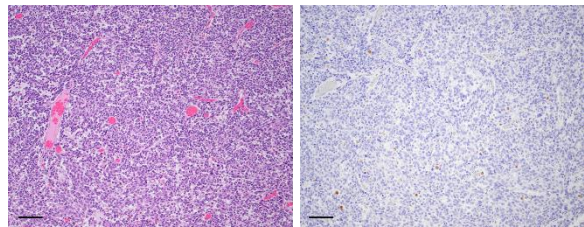

(g)

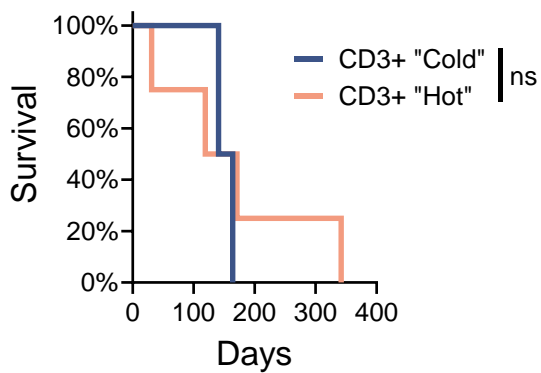

**Extended Data Figure 9: IHC analysis of CD3 infiltration in progressor dogs.**

(a-f) For each dog, left image: H&E stained sample of primary tumor following patient euthanasia; right image: CD3 IHC staining for T cell infiltration at the same timepoint. Scale bar: 100um. (g) Overall survival of patients was not predicted by CD3 infiltration immunotype (hot vs. cold/excluded) using log-rank (Mantel-Cox) test. Ns: not significant.

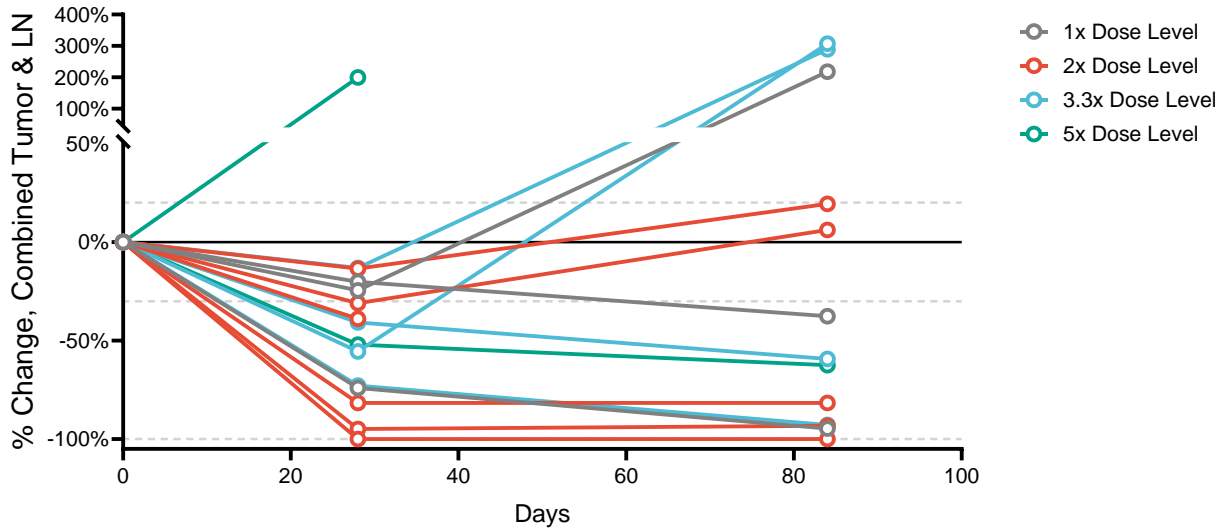

92  
93

94 **Extended Data Figure 10: Combined tumor and metastatic LN treatment response.** CT  
 95 measurements from primary tumor and diseased LN were combined to assess overall treatment  
 96 response. Two dogs were euthanized prior to day 84 CT measurement due to progression of  
 97 brain/CNS metastasis (not imaged via CT) or lung metastasis (not measured after CT). Dotted  
 98 lines depict RECIST criteria for stable disease and partial response to treatment.
